# Supplementary material for: Impact of Phage CDHS-1 on the Transcription, Physiology and Pathogenicity of a Clostridioides difficile Ribotype 027 Strain, R20291
Source: MDPI journal article supplement (doi:10.3390/v13112262), 2021-11-11
Supplement: s1 [file s1]

**Table S1. List of PCR primers of virulence genes used in this study.**

| Virulence genes                |                                          |                 |                                                    |                                                                 |                   |
|--------------------------------|------------------------------------------|-----------------|----------------------------------------------------|-----------------------------------------------------------------|-------------------|
| No.                            | Gene                                     | Locus_tag       | Product                                            | Primers<br>(forward& reverse)                                   | Amplicons<br>size |
| 1                              | tcdA                                     | CDR20291_0584   | Toxin A                                            | F<br>AGCTTTCGCTTTAGGCAGTG<br>R<br>TGGCTGGGTAAAGGTGTTGG          | 128               |
| 2                              | tcdB                                     | CDR20291_0582   | Toxin B                                            | F<br>GGAAGGTGGCTCAGGTCATA<br>R<br>GTCCATCCTGTTTCCCAAGC          | 201               |
| 3                              | Binary toxin<br>CDT                      | CDR20291_2491   | actin-specific<br>ADP<br>ribosyltransfer<br>ase    | F<br>ATGGGAAGGACAAGCACTGT<br>R<br>CCTGCATAACCTGGAATAGCTG        | 156               |
| 4                              | tcdE                                     | CDR20291_0583   | Putative cell<br>wall hydrolase<br>protein         | F AGGAGGCGTTATGAATATGACAA<br>R TGCTACTTTTCTGATTCTCCATCT         | 166               |
| 5                              | dtxA(tcdC)                               | CDR20291_0585   | Putative<br>exported<br>protein                    | F AGGAGGCGTTATGAATATGACAA<br>R<br>TGCTACTTTTCTGATT<br>CCTCCATCT | 105               |
| 6                              | tcdD(tcdR)                               | CDR20291_0581   | Putative<br>transcriptional<br>regulator           | F<br>GCAAGAAATAACTCAGTAG<br>R<br>CTGTTTCTCCCTCTTCATAATG         | 135               |
| 7                              | agrB<br>(accessory<br>gene<br>regulator) | CDR20291_2640   | Accessory<br>gene regulator<br>B                   | F<br>TTCCAACCCAACTAACACTTGC<br>R CAGGAGGGTATCATGCAGACAAT        | 147               |
| 8                              | (accessory<br>gene<br>regulator          | CDR20291_3187   | Accessory<br>gene regulator                        | F TCTCACTTCACTAAGAGGTTTGT<br>R<br>CAGTTCACAGGAGGTTATCATGC       | 208               |
| 9                              | spmA                                     | CDR20291_3377   | spore<br>maturation<br>protein A                   | F<br>ACCATTTCAGCACCCAACA<br>R<br>TGGCACTCTGGATGGGGATA           | 176               |
| 10                             | fliA                                     | CDR20291_0270   | RNA<br>polymerase<br>sigma factor<br>for flagellar | F AAGTGATAGAGAAGAGGAAGCTC<br>R<br>TGAAACACCTAGCACTTTCCC         | 174               |
| Reference (Housekeeping) genes |                                          |                 |                                                    |                                                                 |                   |
| 1                              | 16S<br>ribosomal<br>RNA                  | 1087908.1089531 | 16S ribosomal<br>RNA                               | F<br>GATGGACCCGCGTCTGATTA<br>R<br>CGTAGGAGTTTGGACCGTGT          | 120               |
| 2                              | RecA                                     | CDR20291_1169   | protein<br>(recombinase<br>A)                      | F<br>ACTGGAGGACGTGCACTAAA<br>R                                  | 146               |

|  |  |  |  |                       |  |
|--|--|--|--|-----------------------|--|
|  |  |  |  | GCTTGCTTAAATGGTGGTGCT |  |
|--|--|--|--|-----------------------|--|

**Table S2 Oligonucleotides used to detect phage CDHS1 during lysogen and phage resistant strain isolation**

| Gene name    | Primer sequences                                                    | Expected amplicon size |
|--------------|---------------------------------------------------------------------|------------------------|
| Holin        | F 5'- GGACTAGGAGCAGTAGGGATAT-3'<br>R 5'- CTTCTACGTCCGTTTTTCATTGC-3' | 181 bp                 |
| Minor capsid | F 5'- AAGGGCTGTGCTTACTGGTG-3'<br>F 5'- ACCATTTGCCCTGCCATTTC-3'      | 147 bp                 |

**Table S3 Stress markers investigated during *C. difficile* infection and phage therapy regimens in *G. mellonella***

| Gene function       | Number of genes | Gene name/locus tag                                                                                                                                                                                                                                                                              | Reference |
|---------------------|-----------------|--------------------------------------------------------------------------------------------------------------------------------------------------------------------------------------------------------------------------------------------------------------------------------------------------|-----------|
| Growth              | 10              | GME-string_contig704.0<br>GME stringcontig233.0_1<br>Juvenile hormone epoxid_1<br>Juvenile hormone epoxi_2<br>Juvenile hormone binding_1<br>Juvenile hormone esterase_1<br>Juvenile hormone-inducible_1<br>Juvenile hormone binding_3<br>Juvenile hormone binding_4<br>Juvenile hormone-esterase | [18, 51]  |
| Infection           | 2               | Moricin,<br>Gloverin                                                                                                                                                                                                                                                                             |           |
| <i>Reproduction</i> | 2               | <i>Ecdysteroid_regulated_pr 1</i><br><i>Ecdysteroid_22-kinase 1</i>                                                                                                                                                                                                                              |           |

**Table S4** Table showing 20 most upregulated and downregulated genes with their products for both R20291 and  $\phi$ CDHS1 during infection at 0 min. The  $\phi$ CDHS1 genes are highlighted in yellow. Expression level changes considered significant if they differed at least 2-fold ( $\log_2$  fold change) and at  $P$  value of 0.01.

| No. | locus_tag/Gene | Fold Change(Infected vs. control 0 min) | Product/function                           |
|-----|----------------|-----------------------------------------|--------------------------------------------|
| 1   | CDHS1_00037    | 654.211                                 | Cro/C1-type transcriptional regulator      |
| 2   | CDHS1_00046    | 564.626                                 | hypothetical protein                       |
| 3   | CDHS1_00049    | 561.716                                 | hypothetical protein                       |
| 4   | CDHS1_00040    | 519.891                                 | hypothetical protein                       |
| 5   | CDHS1_00038    | 504.148                                 | hypothetical protein                       |
| 6   | CDHS1_00045    | 495.471                                 | hypothetical protein                       |
| 7   | CDHS1_00039    | 470.415                                 | hypothetical protein                       |
| 8   | CDHS1_00047    | 466.066                                 | single-stranded DNA-binding protein        |
| 9   | CDHS1_00041    | 423.605                                 | replication terminator-like protein        |
| 10  | CDHS1_00035    | 325.126                                 | DNAse/helicase                             |
| 11  | CDHS1_00042    | 273.94                                  | hypothetical protein                       |
| 12  | CDHS1_00044    | 268.932                                 | hypothetical protein                       |
| 13  | CDHS1_00028    | 162.17                                  | hypothetical protein                       |
| 14  | CDR20291_2456  | 20.0979                                 | nucleotide binding                         |
| 15  | CDR20291_1626  | 11.8031                                 | sodium-dependent phosphate transport       |
| 16  | CDR20291_2119  | 10.4262                                 | sodium-dependent phosphate transport       |
| 17  | CDR20291_2118  | 4.83674                                 | ATP binding                                |
| 18  | <i>hymA</i>    | 4.55331                                 | iron, sulfur cluster binding               |
| 19  | CDR20291_3014  | 4.41467                                 | membrane                                   |
| 20  | <i>hymB</i>    | 3.81349                                 | iron, sulfur cluster binding               |
| 21  | CDR20291_1888  | -6.5172                                 | membrane,integral component of membrane    |
| 22  | CDR20291_0191  | -6.90089                                | membrane,integral component of membrane    |
| 23  | CDR20291_1107  | -7.41948                                | membrane,integral component of membrane    |
| 24  | CDR20291_0318  | -7.50064                                | metabolic process                          |
| 25  | CDR20291_2417  | -7.84032                                | sequence-specific DNA binding              |
| 26  | CDR20291_1334  | -8.32649                                | conserved hypothetical protein             |
| 27  | CDR20291_0949  | -8.38665                                | membrane,integral component of membrane    |
| 28  | <i>fldX</i>    | -8.42604                                | electron carrier activity                  |
| 29  | CDR20291_1472  | -9.33038                                | peptidoglycan turnover                     |
| 30  | CDR20291_1184  | -9.88288                                | hypothetical protein                       |
| 31  | CDR20291_3277  | -10.5225                                | membrane,integral component of membrane    |
| 32  | CDR20291_0665  | -11.8302                                | glycerophospholipid metabolic process      |
| 33  | CDR20291_0317  | -12.2253                                | regulation of transcription, DNA-templated |
| 34  | CDR20291_1265  | -12.3782                                | drug transmembrane transport               |
| 35  | CDR20291_1546  | -12.6894                                | transporter activity                       |
| 36  | CDR20291_1935  | -15.3289                                | hypothetical protein                       |
| 37  | CDR20291_1934  | -17.6984                                | hypothetical protein                       |
| 38  | CDR20291_1751  | -21.3311                                | membrane,integral component of membrane    |

|    |               |          |                            |
|----|---------------|----------|----------------------------|
| 39 | CDR20291_1279 | -21.434  | membrane                   |
| 40 | CDR20291_1889 | -28.5816 | acyl-CoA metabolic process |

**Table S5** Table showing 20 most upregulated and downregulated genes with their products for both R20291 and  $\phi$ CDHS1 during infection at 10 min. The  $\phi$ CDHS1 genes are highlighted in yellow. Expression level changes considered significant if they differed at least 2-fold ( $\log_2$  fold change) and at  $P$  value of 0.01.

| No. | locus tag/Gene | FoldChange(Infected vs. control 10 min) | Product/function                      |
|-----|----------------|-----------------------------------------|---------------------------------------|
| 1   | CDHS1_00012    | 721.281                                 | hypothetical protein                  |
| 2   | CDHS1_00047    | 612.555                                 | Cro/C1-type transcriptional regulator |
| 3   | CDHS1_00037    | 586.981                                 | single-stranded DNA-binding protein   |
| 4   | CDHS1_00002    | 566.739                                 | terminase large subunit               |
| 5   | CDHS1_00041    | 487.13                                  | replication terminator-like protein   |
| 6   | CDHS1_00039    | 470.491                                 | hypothetical protein                  |
| 7   | CDHS1_00042    | 460.395                                 | hypothetical protein                  |
| 8   | CDHS1_00020    | 455.887                                 | hypothetical protein                  |
| 9   | CDHS1_00040    | 454.529                                 | hypothetical protein                  |
| 10  | CDHS1_00013    | 449.029                                 | hypothetical protein                  |
| 11  | CDHS1_00011    | 414.62                                  | minor capsid protein                  |
| 12  | CDHS1_00010    | 400.269                                 | hypothetical protein                  |
| 13  | CDHS1_00017    | 386.067                                 | tail tape measure                     |
| 14  | CDHS1_00044    | 379.648                                 | hypothetical protein                  |
| 15  | CDHS1_00022    | 374.96                                  | tail protein                          |
| 16  | CDHS1_00051    | 367.136                                 | integrase                             |
| 17  | CDHS1_00049    | 365.803                                 | hypothetical protein                  |
| 18  | CDHS1_00050    | 352.071                                 | sigma70/sigmaF-like protein           |
| 19  | CDHS1_00019    | 350.366                                 | tail endopeptidase                    |
| 20  | CDHS1_00014    | 347.124                                 | hypothetical protein                  |
| 21  | CDR20291_3359  | -8.72486                                | conserved hypothetical protein        |
| 22  | CDR20291_1073  | -9.26481                                | hypothetical protein                  |
| 23  | CDR20291_0319  | -10.3825                                | putative membrane protein             |
| 24  | CDR20291_0364  | -10.9479                                | putative membrane protein             |
| 25  | CDR20291_0320  | -11.1369                                | hypothetical protein                  |
| 26  | <i>mtIA</i>    | -11.5234                                | mannitol-specific IIbc component      |
| 27  | CDR20291_0363  | -11.9947                                | Radical SAM-superfamily protein       |
| 28  | CDR20291_2417  | -12.5656                                | conserved hypothetical protein        |
| 29  | <i>mtIR</i>    | -12.6454                                | putative transcription antiterminator |
| 30  | CDR20291_3387  | -13.2019                                | conserved hypothetical protein        |
| 31  | <i>mtID</i>    | -14.6155                                | mannitol-phosphate-dehydrogenase      |
| 32  | CDR20291_2867  | -14.9361                                | putative aminotransferase             |
| 33  | <i>mtIF</i>    | -16.1598                                | mannitol-specific IIa component       |
| 34  | CDR20291_1750  | -20.4967                                | binding protein                       |
| 35  | CDR20291_1751  | -25.9699                                | permease protein                      |
| 36  | CDR20291_2418  | -26.27                                  | putative membrane protein             |
| 37  | CDR20291_1889  | -31.2186                                | putative acyl-CoA thioesterase        |
| 38  | CDR20291_1938  | -38.0721                                | permease protein                      |
| 39  | CDR20291_2419  | -40.6191                                | putative aminotransferase             |
| 40  | CDR20291_1752  | -330.743                                | permease protein                      |

**Table S6** Table showing 20 most upregulated and downregulated genes with their products for both R20291 and  $\phi$ CDHS1 during infection at 20 min. The  $\phi$ CDHS1 genes are highlighted in yellow. Expression level changes considered significant if they differed at least 2-fold ( $\log_2$  fold change) and at  $P$  value of  $<0.01$ .

| No. | locus_tag/Gene | FoldChange(Infected vs. control 20 min) | Product/function                   |
|-----|----------------|-----------------------------------------|------------------------------------|
| 1   | CDHS1_00023    | 722.602                                 | holin                              |
| 2   | CDHS1_00019    | 711.131                                 | Distal tail protein                |
| 3   | CDHS1_00025    | 546.103                                 | Endolysin                          |
| 4   | CDHS1_00031    | 510.54                                  | Hypothetical protein               |
| 5   | CDHS1_00021    | 505.268                                 | tail fiber protein                 |
| 6   | CDHS1_00002    | 489.217                                 | terminase large subunit            |
| 7   | CDHS1_00020    | 472.23                                  | Hypothetical protein               |
| 8   | CDHS1_00032    | 442.065                                 | DNA-binding protein                |
| 9   | CDHS1_00005    | 436.93                                  | Hypothetical protein               |
| 10  | CDHS1_00042    | 397.429                                 | Hypothetical protein               |
| 11  | CDHS1_00028    | 391.181                                 | Hypothetical protein               |
| 12  | CDHS1_00022    | 385.525                                 | tail fiber protein                 |
| 13  | CDHS1_00013    | 381.488                                 | Hypothetical protein               |
| 14  | CDHS1_00050    | 380.02                                  | sigma70/sigmaF-like protein        |
| 15  | CDHS1_00007    | 375.468                                 | scaffolding protein                |
| 16  | CDHS1_00010    | 371.915                                 | Hypothetical protein               |
| 17  | CDHS1_00051    | 366.062                                 | integrase                          |
| 18  | CDHS1_00018    | 359.421                                 | tail protein                       |
| 19  | CDHS1_00040    | 349.339                                 | Hypothetical protein               |
| 20  | CDHS1_00011    | 347.509                                 | minor capsid protein               |
| 21  | CDR20291_2050  | -8.76834                                | putative transcriptional regulator |
| 22  | CDR20291_0203  | -9.28835                                | conserved hypothetical protein     |
| 23  | CDR20291_2416  | -9.32831                                | conserved hypothetical protein     |
| 24  | CDR20291_1107  | -9.46141                                | permease protein                   |
| 25  | CDR20291_1546  | -10.5254                                | permease protein                   |
| 26  | CDR20291_2867  | -10.814                                 | putative aminotransferase          |
| 27  | CDR20291_1575  | -12.3802                                | putative membrane protein          |
| 28  | CDR20291_1889  | -15.2629                                | putative acyl-CoA thioesterase     |
| 29  | CDR20291_1184  | -16.1539                                | hypothetical protein               |
| 30  | CDR20291_0319  | -16.7031                                | putative membrane protein          |
| 31  | CDR20291_0364  | -21.0257                                | putative membrane protein          |
| 32  | CDR20291_0363  | -24.3725                                | Radical SAM protein                |
| 33  | CDR20291_3194  | -27.576                                 | putative glycosyl transferase      |
| 34  | CDR20291_2417  | -31.4166                                | conserved hypothetical protein     |
| 35  | CDR20291_3154  | -43.4484                                | hypothetical protein               |
| 36  | CDR20291_1751  | -49.3662                                | permease protein                   |
| 37  | CDR20291_0979  | -63.5015                                | hypothetical protein               |
| 38  | CDR20291_1752  | -63.7285                                | permease protein                   |
| 39  | CDR20291_2419  | -82.2712                                | putative aminotransferase          |
| 40  | CDR20291_2418  | -83.2952                                | putative membrane protein          |

**Table S7** Table showing 20 most upregulated and downregulated genes with their products for both R20291 and  $\phi$ CDHS1 during infection at 30 min. The  $\phi$ CDHS1 genes are highlighted in yellow. Expression level changes considered significant if they differed at least 2-fold ( $\log_2$  fold change) and at  $P$  value of 0.01.

| No. | locus_tag/Gene | FoldChange(Infected vs. control 30 min) | Product/function                      |
|-----|----------------|-----------------------------------------|---------------------------------------|
| 1   | ICDHS1_00032   | 1318.59                                 | DNA-binding protein                   |
| 2   | CDHS1_00025    | 980.483                                 | Endolysin                             |
| 3   | CDHS1_00023    | 979.053                                 | holin                                 |
| 4   | CDHS1_00001    | 866.272                                 | terminase small subunit               |
| 5   | CDHS1_00045    | 834.868                                 | hypothetical protein                  |
| 6   | CDHS1_00013    | 823.313                                 | hypothetical protein                  |
| 7   | CDHS1_00012    | 781.766                                 | hypothetical protein                  |
| 8   | CDHS1_00031    | 779.161                                 | Hypothetical protein                  |
| 9   | CDHS1_00002    | 723.079                                 | terminase large subunit               |
| 10  | CDHS1_00050    | 669.938                                 | sigma70/sigmaF-like protein           |
| 11  | CDHS1_00007    | 641.889                                 | scaffolding protein                   |
| 12  | CDHS1_00040    | 637.818                                 | Hypothetical protein                  |
| 13  | CDHS1_00010    | 625.585                                 | Hypothetical protein                  |
| 14  | CDHS1_00021    | 622.64                                  | tail fiber protein                    |
| 15  | CDHS1_00011    | 600.556                                 | minor capsid protein                  |
| 16  | CDHS1_00019    | 592.162                                 | Distal tail protein                   |
| 17  | CDHS1_00018    | 574.821                                 | tail protein                          |
| 18  | CDHS1_00020    | 555.707                                 | Hypothetical protein                  |
| 19  | CDHS1_00014    | 517.953                                 | Hypothetical protein                  |
| 20  | CDHS1_00051    | 512.887                                 | integrase                             |
| 21  | CDR20291_2104  | -7.30782                                | putative subunit of oxidoreductase    |
| 22  | CDR20291_0203  | -7.49629                                | conserved hypothetical pr.            |
| 23  | CDR20291_1753  | -8.36869                                | utative uncharacterized pr.           |
| 24  | <i>fhuB</i>    | -8.46628                                | permease protein                      |
| 25  | CDR20291_2867  | -8.84382                                | putative aminotransferase             |
| 26  | CDR20291_1752  | -9.35524                                | permease protein                      |
| 27  | CDR20291_1750  | -9.89837                                | atp-binding protein                   |
| 28  | CDR20291_1691  | -10.1105                                | nitrite and sulfite reductase subunit |
| 29  | CDR20291_2416  | -11.062                                 | conserved hypothetical protein        |
| 30  | CDR20291_1889  | -12.5392                                | putative acyl-CoA thioesterase        |
| 31  | CDR20291_0979  | -13.6647                                | hypothetical protein                  |
| 32  | CDR20291_1692  | -15.8439                                | pyridine n-disulfide oxidoreductase   |
| 33  | CDR20291_1546  | -17.0769                                | permease protein                      |
| 34  | CDR20291_1334  | -17.2296                                | conserved hypothetical protein        |
| 35  | CDR20291_1751  | -21.1816                                | permease protein                      |
| 36  | CDR20291_0364  | -24.3586                                | putative membrane protein             |
| 37  | CDR20291_0363  | -26.0195                                | Radical SAM-superfamily protein       |

|    |               |          |                                |
|----|---------------|----------|--------------------------------|
| 38 | CDR20291_2417 | -33.6534 | conserved hypothetical protein |
| 39 | CDR20291_2419 | -81.7977 | putative aminotransferase      |
| 40 | CDR20291_2418 | -83.178  | putative membrane protein      |



**Table S8** Table showing 20 most upregulated and downregulated genes with their products for both R20291 and  $\phi$ CDHS1 during infection at 40 min. The  $\phi$ CDHS1 genes are highlighted in yellow. Expression level changes considered significant if they differed at least 2-fold ( $\log_2$  fold change) and at *P* value of 0.01.

| No. | locus_tag/Gene | Fold Change (Infected vs. control 40 min) | Product/function                      |
|-----|----------------|-------------------------------------------|---------------------------------------|
| 1   | CDHS1_00005    | 1091.17                                   | hypothetical protein                  |
| 2   | CDHS1_00010    | 1076.3                                    | Hypothetical protein                  |
| 3   | CDHS1_00025    | 957.978                                   | Endolysin                             |
| 4   | CDHS1_00021    | 818.306                                   | tail fiber protein                    |
| 5   | CDHS1_00004    | 799.91                                    | minor capsid protein                  |
| 6   | CDHS1_00013    | 789.05                                    | hypothetical protein                  |
| 7   | CDHS1_00023    | 770.38                                    | holin                                 |
| 8   | CDHS1_00019    | 768.284                                   | Distal tail protein                   |
| 9   | CDHS1_00007    | 752.144                                   | scaffolding protein                   |
| 10  | CDHS1_00001    | 726.61                                    | terminase small subunit               |
| 11  | CDHS1_00012    | 721.443                                   | hypothetical protein                  |
| 12  | CDHS1_00017    | 710.088                                   | tail tape measure                     |
| 13  | CDHS1_00014    | 680.081                                   | Hypothetical protein                  |
| 14  | CDHS1_00011    | 655.499                                   | minor capsid protein                  |
| 15  | CDHS1_00018    | 646.67                                    | tail protein                          |
| 16  | CDHS1_00020    | 640.583                                   | Hypothetical protein                  |
| 17  | CDHS1_00024    | 627.541                                   | acetylmuramoyl-alanine amidase        |
| 18  | CDHS1_00051    | 619.045                                   | integrase                             |
| 19  | CDHS1_00022    | 598.937                                   | tail protein                          |
| 20  | CDHS1_00002    | 587.468                                   | terminase large subunit               |
| 21  | CDR20291_1546  | -5.76995                                  | permease protein                      |
| 22  | CDR20291_1888  | -6.06205                                  | putative membrane protein             |
| 23  | CDR20291_2905  | -6.36114                                  | glycosyl hydrolase                    |
| 24  | CDR20291_0020  | -7.22069                                  | transcriptional regulator             |
| 25  | CDR20291_0724  | -7.74541                                  | putative membrane protein             |
| 26  | CDR20291_2532  | -7.87691                                  | sporulation sigma E factor peptidase  |
| 27  | CDR20291_1750  | -8.78868                                  | putative lantibiotic abc transporter  |
| 28  | CDR20291_0300  | -9.78877                                  | putative biotin synthase              |
| 29  | CDR20291_3277  | -10.3145                                  | putative exported protein             |
| 30  | CDR20291_1889  | -12.0696                                  | putative acyl-CoA thioesterase        |
| 31  | CDR20291_2417  | -14.9121                                  | conserved hypothetical protein        |
| 32  | CDR20291_1752  | -16.4006                                  | permease protein                      |
| 33  | CDR20291_1691  | -19.8677                                  | nitrite and sulfite reductase subunit |
| 34  | CDR20291_0364  | -20.8629                                  | putative membrane protein             |
| 35  | CDR20291_0363  | -21.1467                                  | Radical SAM-superfamily protein       |
| 36  | CDR20291_1692  | -25.4408                                  | pyridine n-disulfide oxidoreductase   |

|    |               |          |                                 |
|----|---------------|----------|---------------------------------|
| 37 | CDR20291_0728 | -28.1149 | hydroxymethylglutaryl-CoA lyase |
| 38 | CDR20291_2418 | -40.4521 | putative membrane protein       |
| 39 | CDR20291_2419 | -42.8241 | putative aminotransferase       |
| 40 | CDR20291_1751 | -137.447 | permease protein                |

**Table S9** Table showing 20 most upregulated and downregulated genes with their products for both R20291 and  $\phi$ CDHS1 during infection at 50 min. The  $\phi$ CDHS1 genes are highlighted in yellow. Expression level changes considered significant if they differed at least 2-fold ( $\log_2$  fold change) and at  $P$  value of 0.01.

| No. | locus_tag/Gene | Fold Change (Infected vs. control 50 min) | Product/function                    |
|-----|----------------|-------------------------------------------|-------------------------------------|
| 1   | CDHS1_00021    | 1343.49                                   | tail fiber protein                  |
| 2   | CDHS1_00025    | 1144.53                                   | Endolysin                           |
| 3   | CDHS1_00011    | 971.929                                   | minor capsid protein                |
| 4   | CDHS1_00001    | 921.066                                   | terminase small subunit             |
| 5   | CDHS1_00022    | 907.514                                   | tail protein                        |
| 6   | CDHS1_00007    | 885.546                                   | scaffolding protein                 |
| 7   | CDHS1_00023    | 852.48                                    | holin                               |
| 8   | CDHS1_00012    | 848.368                                   | hypothetical protein                |
| 9   | CDHS1_00013    | 818.554                                   | hypothetical protein                |
| 10  | CDHS1_00050    | 815.101                                   | sigma70/sigmaF-like protein         |
| 11  | CDHS1_00024    | 783.44                                    | putative endolysin                  |
| 12  | CDHS1_00010    | 777.711                                   | Hypothetical protein                |
| 13  | CDHS1_00019    | 775.422                                   | Distal tail protein                 |
| 14  | CDHS1_00002    | 750.84                                    | terminase large subunit             |
| 15  | CDHS1_00051    | 717.438                                   | integrase                           |
| 16  | CDHS1_00020    | 620.057                                   | Hypothetical protein                |
| 17  | CDHS1_00018    | 618.126                                   | tail protein                        |
| 18  | CDHS1_00017    | 616.396                                   | tail tape measure                   |
| 19  | CDHS1_00015    | 592.191                                   | Hypothetical protein                |
| 20  | CDHS1_00014    | 585.389                                   | Hypothetical protein                |
| 21  | CDR20291_0602  | -6.11481                                  | putative membrane protein precursor |
| 22  | <i>fhuG</i>    | -6.3018                                   | permease protein                    |
| 23  | <i>fhuB</i>    | -7.49698                                  | permease protein                    |
| 24  | CDR20291_1750  | -7.53438                                  | atp-binding protein                 |
| 25  | CDR20291_1744  | -7.58244                                  | ite-specific recombinase            |
| 26  | CDR20291_0203  | -8.29159                                  | conserved hypothetical protein      |
| 27  | CDR20291_0319  | -9.43268                                  | putative membrane protein           |
| 28  | CDR20291_1889  | -9.62194                                  | putative acyl-CoA thioesterase      |
| 29  | CDR20291_2417  | -10.2041                                  | conserved hypothetical protein      |
| 30  | CDR20291_3207  | -10.5323                                  | permease protein                    |
| 31  | CDR20291_2419  | -11.8593                                  | putative aminotransferase           |
| 32  | CDR20291_2497  | -12.195                                   | conserved hypothetical protein      |
| 33  | CDR20291_0364  | -12.3357                                  | putative membrane protein           |
| 34  | CDR20291_2867  | -12.4293                                  | putative aminotransferase           |
| 35  | CDR20291_0363  | -13.4737                                  | Radical SAM-superfamily protein     |
| 36  | CDR20291_1546  | -13.7981                                  | permease protein                    |
| 37  | CDR20291_2418  | -14.4336                                  | putative membrane protein           |

|    |               |          |                                       |
|----|---------------|----------|---------------------------------------|
| 38 | CDR20291_1751 | -22.587  | permease protein                      |
| 39 | CDR20291_1691 | -26.8781 | nitrite and sulfite reductase subunit |
| 40 | CDR20291_1692 | -28.5576 | pyridine n-disulfide oxidoreductase   |
